# Supplementary material
Source: PubMed Central journal article supplement (PMC3887434)
Supplement: Supp_Figure1.pdf [file Supp_Figure1.pdf]

## Supplementary Data

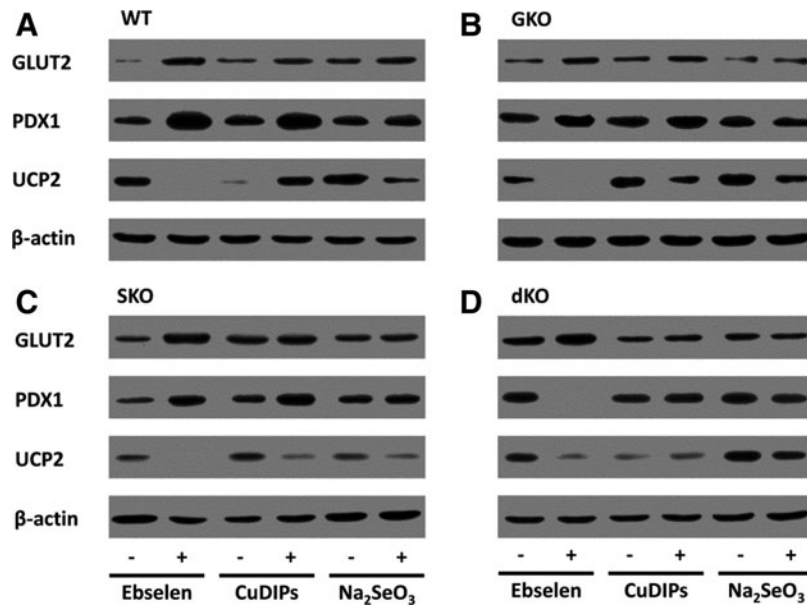

**SUPPLEMENTARY FIG. S1. Impacts of the GPX and SOD mimics and inorganic selenium on protein production of key GSIS regulators in islets.** The islets were isolated from WT (A), GKO (B), SKO (C), and dKO (D) mice and pre-treated with ebselen ( $50 \mu\text{M}$  in DMSO), CuDIPs ( $10 \mu\text{M}$  in ethanol), and sodium selenite ( $100 \text{ nM}$  in saline) or the respective solvent controls for 5 h. Thereafter, the islets were stimulated by  $16.7 \text{ mM}$  glucose for 1 h. The blots are representatives of five independent Western-blot analyses for GLUT2, PDX1, and UCP2. + represents treated and - represents respective solvent control groups. CuDIPs, copper diisopropylsalicylate; dKO, double knockout of GPX1 and SOD1; DMSO, dimethyl sulfoxide; GKO, GPX1 knockout; GLUT2, glucose transporter type 2; GSIS, glucose-stimulated insulin secretion; PDX1, pancreatic and duodenal homeobox 1; SEM, standard error of the mean; SKO, SOD1 knockout; UCP2, uncoupling protein 2; and WT, wild type.
