# Supplementary material
Source: PubMed Central journal article supplement (PMC3887434)
Supplement: Supp_Figure2.pdf [file Supp_Figure2.pdf]

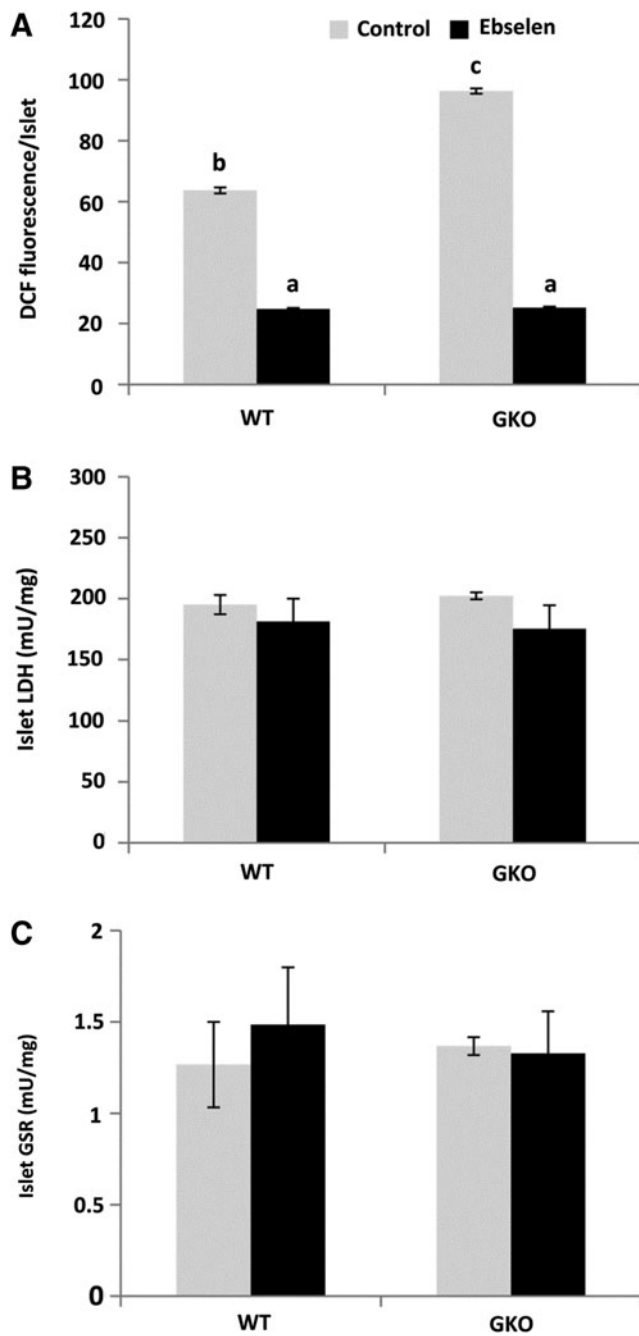

SUPPLEMENTARY FIG. S2. Impacts of the GPX mimic on intracellular ROS status and thiol-containing enzyme functions in islets of the WT and GKO mice. ROS status (A), LDH activity (B), and GSR activity (C). Values are means  $\pm$  SEM (n = 3). Means without sharing a common letter a, b, and c are different ( $p < 0.01$ ) in (A). GPX, glutathione peroxidase; GSR, glutathione reductase; LDH, lactate dehydrogenase; and ROS, reactive oxygen species.
