# Supplementary material
Source: PubMed Central journal article supplement (PMC3887434)
Supplement: Supp_Figure3.pdf [file Supp_Figure3.pdf]

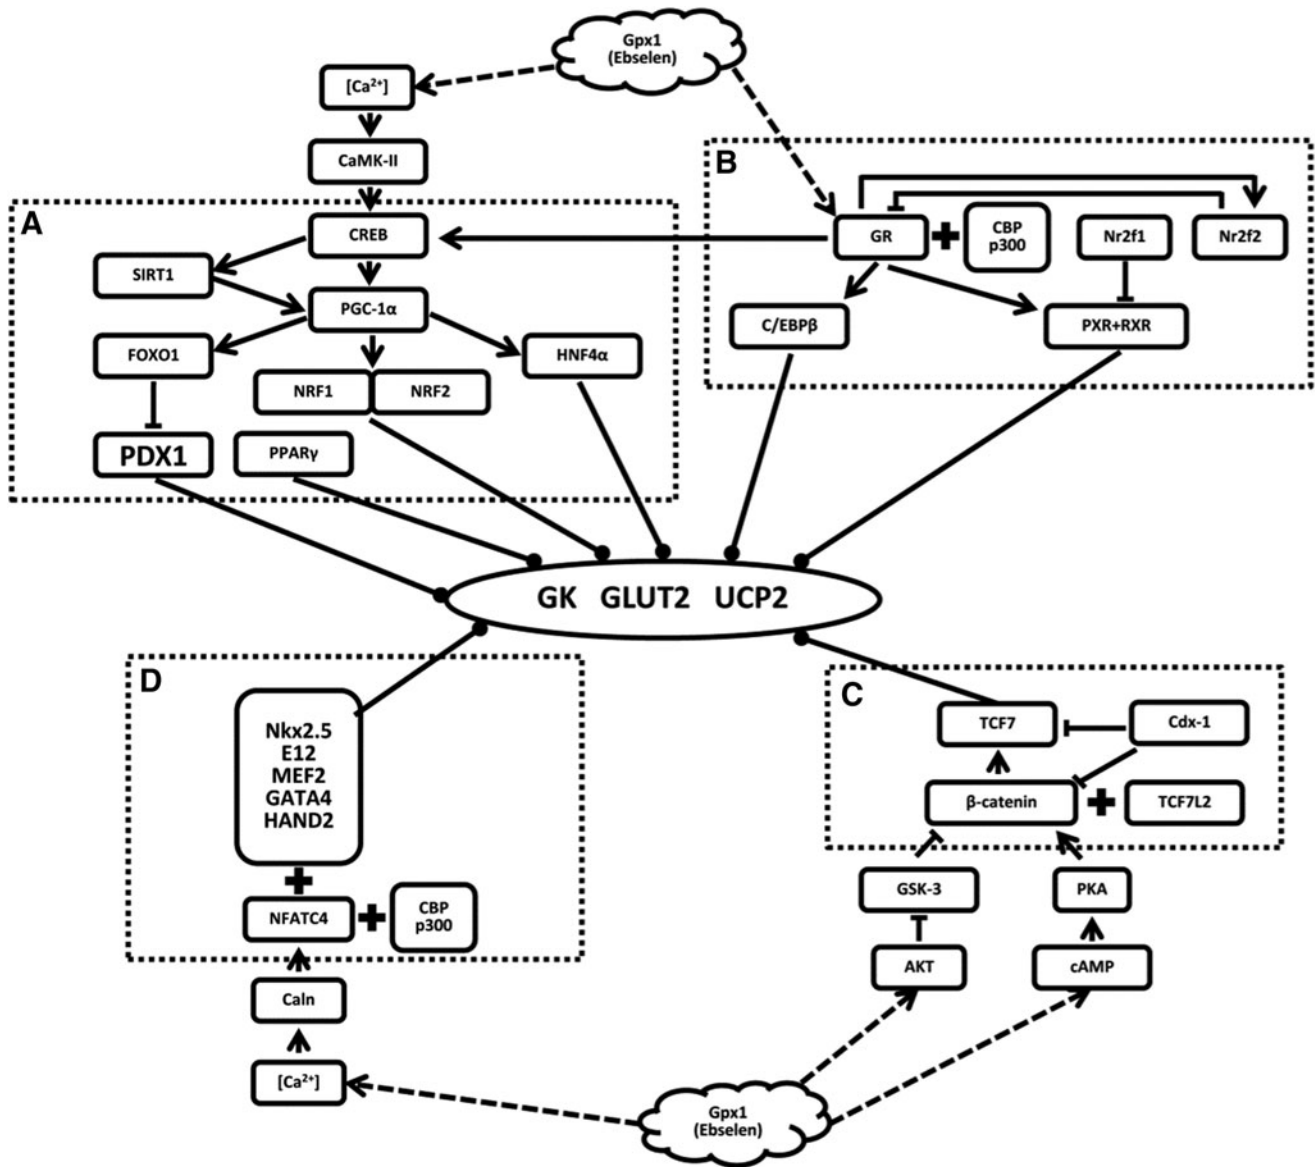

SUPPLEMENTARY FIG. S3. An illustration showing the bioinformatics-derived signaling pathways for expressions of GK, GLUT2, PDX1, and UCP2 regulated by ebselen. The dotted boxes indicate four different signaling pathways: (A) ARE, (B) GR, (C) Wnt, and (D) NFAT. ARE, antioxidant response element; GK, glucokinase; GR, glucocorticoid receptor; NFAT, nuclear factor of activated T-cells; Wnt, wingless-type MMTV integration site.
