# Supplementary material
Source: PubMed Central journal article supplement (PMC3887434)
Supplement: Supp_Figure4.pdf [file Supp_Figure4.pdf]

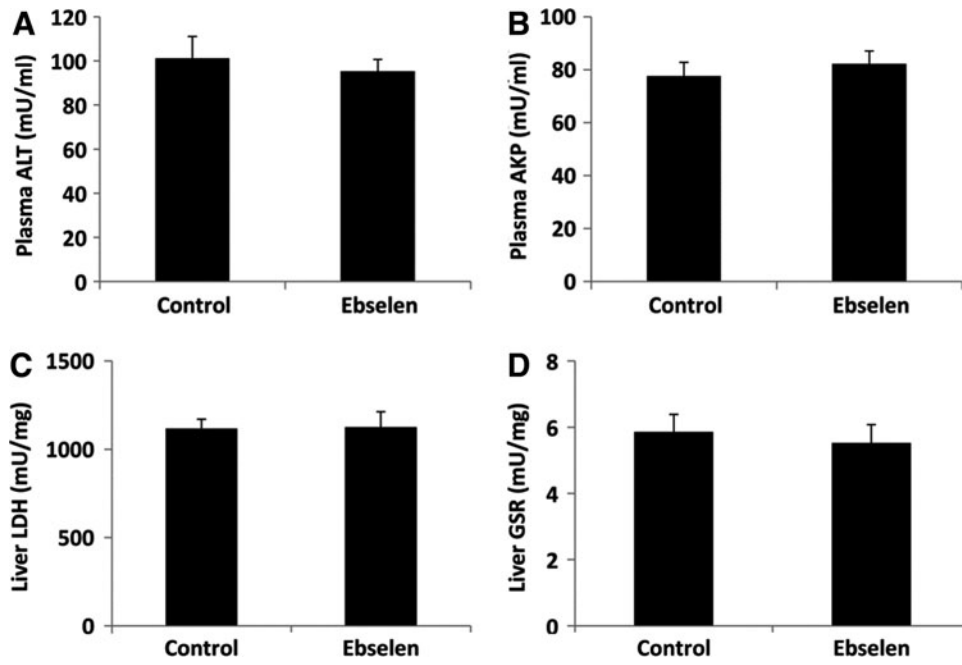

SUPPLEMENTARY FIG. S4. The lack of side effects of the GPX mimic injection in the GKO mice. Activities of plasma ALT (A), plasma AKP (B), liver LDH (C), and liver GSR (D). Ebselen (50 mg/kg) was injected (i.p.) into the fasting (overnight for 8 h) GKO mice at 1 h before the blood and liver sample collections. The same volume of DMSO was injected as the solvent control. Values are means  $\pm$  SEM (n = 5). AKP, alkaline phosphatase; ALT, alanine aminotransferase.
