# Supplementary material
Source: PubMed Central journal article supplement (PMC3887434)
Supplement: Supp_Table1.pdf [file Supp_Table1.pdf]

SUPPLEMENTARY TABLE S1. PRIMERS LISTED FOR REAL-TIME QUANTITATIVE REAL-TIME POLYMERASE CHAIN REACTION

| Gene               | Forward primer            | Reverse primer            | T <sub>m</sub> (For, Rev) | Size       |     |
|--------------------|---------------------------|---------------------------|---------------------------|------------|-----|
| ARE pathway        | HPRT                      | TTCCCTGGTTAAGCAGTACAGCCC  | TGGCCTGTATCCAACACTTCGAGA  | 60.6, 59.6 | 89  |
|                    | CAMK-II                   | TGAGGCCAACACAAAGCTGTACCA  | TGGTCAGCATCTGGTTGATGAGGT  | 60.0, 60.0 | 116 |
|                    | CREB1                     | ACAGCAGATTCTAGTCCCAGCAA   | TCCTCAGCAGGCTGTAGGAAGT    | 60.4, 59.6 | 153 |
|                    | SIRT1                     | CCTTTCAGAACCCACCAAGAGGAA  | AATTCAGGAATCCACAGGAGACA   | 59.6, 59.3 | 138 |
|                    | PGC1a                     | AGCACTCAGAACCAATGCAGCAAAC | TTGGTGTGAGGAGGTCATCGTT    | 60.0, 60.1 | 183 |
|                    | Nrf1                      | AGTGAITGCCGCACAGAAGAGCAA  | GTGGCCTGAGTTTGTTTGCTGA    | 60.4, 59.9 | 143 |
|                    | Nrf2                      | AGTTTGCCACATTCACAAACAAAG  | TGAAGACTGAACITTCAGCGTGGC  | 60.0, 59.4 | 138 |
|                    | FoxO1                     | AAGAGCGTGCCCTACTTCAAGGAT  | GTGAAGGACAGATTGTGGCGAAT   | 59.9, 59.2 | 87  |
|                    | HNF4a                     | TTCCGCATGGCCAAAGATTGACAAC | TTGTGCCCCATGTGTTCTTGCAAC  | 60.1, 60.1 | 122 |
|                    | PPARγ                     | ACATAAAGTCCITCCCCTGACCA   | AAATTCCGATGGCCACCTCITTGC  | 59.9, 60.0 | 180 |
|                    | GR pathway                | GCAGTGAATGGGCAAAAGCGGATA  | CCAGGGCAAAATGCCATGAGAAACA | 59.9, 60.0 | 106 |
|                    | SMAD4                     | TGTCACAGGACAGAAAGCGATTGA  | ATCTTATGAACAGGCTGCCAGGT   | 59.9, 60.2 | 180 |
|                    | Cebpb                     | ACAAGCTGAGCGACGAGTACAAGA  | GACAGCTGCTCCACCTTCTCTG    | 59.7, 59.5 | 160 |
| Nr2H1              | TTCAGGAACAGGTGGAGAAAGCTCA | TTTCTCTGCAGGCTTTCGATGTG   | 59.6, 59.4                | 137        |     |
| Nr2f2              | TCCAAGCAAGTGGAGAAGCTCA    | ACTTCTCCAAAGCACACTGGGACT  | 59.8, 60.1                | 159        |     |
| PXR                | TGATGGACGCTCAGATGCAAACTT  | AGAAACTCTGGAAGCTCACAGCCA  | 60.5, 60.0                | 103        |     |
| RXRα               | TGACATGCAGATGGACAAGACGGA  | TGCAGTACGCTTCTAGTGACCGAT  | 60.0, 60.0                | 140        |     |
| Wnt pathway        | Akt1                      | AGCCGCTACTATGCCATGAAGAT   | TGGAATGAGTACTTGAGGGCCGTA  | 59.9, 59.2 | 138 |
|                    | Gsk3b                     | TTGGACCACTGATACACAGCTCA   | TCCACCAACTGATCCACCCACT    | 60.0, 60.1 | 119 |
|                    | Ctnnb1                    | TGGACTCTGCACAACCTTCTCA    | AGTGTCTGATGGCTAGAACAAGT   | 60.0, 59.8 | 132 |
|                    | Tcf7l2                    | AGAGGTGCAGCCATCAACCAGAT   | CTGCATGTGAAGCTGTGTTCCIT   | 60.0, 59.5 | 112 |
|                    | Tcf7                      | TGAGAGCCAAAGTCAATGCTGAGT  | TTCCTGGGGCCAGTTCATAGTA    | 60.1, 59.9 | 128 |
|                    | Cdx1                      | AGGAGTTTCACTACAGCCGGTACA  | CTGCTGCTGCTGTTCTTCTT      | 59.3, 59.9 | 152 |
|                    | Nfatc4                    | ATGGTGGCTACAGCCAGCTATGAA  | TCACCCITCCGTAGCTCAATGCT   | 60.1, 59.4 | 149 |
|                    | CREBBP                    | ATGCCCAATGTTTCCAACGACCTG  | GCCCAGCATGCAAGATGAATCAAA  | 59.9, 60.0 | 94  |
|                    | Ppp3ca                    | TGTGTACAGGTGGTTTGCTCCTCA  | ACAGCCTCTGACTGTGTGTGAGT   | 60.1, 59.9 | 180 |
|                    | Nkx2.5                    | AAATGCTCTCTGCTTTCCTCA     | TTTGTCCAGCTCCACTGCCTTCT   | 58.5, 60.5 | 132 |
| GSIS related genes | Ei2                       | TTCCITTGACCCCTAGCCGGACATA | AACACTGGTGTCTCTCCCAAAGGT  | 59.3, 59.9 | 151 |
|                    | GATA4                     | AGGTGAGCCTGTATGTAATGCCIT  | AGGACCTGCTGGCGTCTTAGATTT  | 59.7, 59.9 | 143 |
|                    | GK                        | AGGGAACAACAATCGTGGGACTTCT | GTGTCAITTCACCAATGGCCACACA | 59.9, 59.9 | 87  |
|                    | GLUT2                     | AAAGGAAGAGGCATCGACTGAGCA  | ACACCAATGTTGTCATACACAGGC  | 60.1, 59.9 | 198 |
|                    | PDX1                      | AGCTCCCTTCCCCTGGATGAAAT   | TAGGCAGTACGGGTCTCTTGTIT   | 60.3, 59.4 | 112 |
|                    | UCP2                      | AGCCTAACAGACCAATGCACGAGA  | ATAGGTCACCAGCTCAGCACAGTT  | 60.0, 59.9 | 109 |
|                    | INS1                      | TAAAGCTGGTGGGCATCCAGTAA   | GGGACCAACAAGATGCTGTTGAC   | 58.9, 58.3 | 174 |

Akt1, protein kinase B; ARE, antioxidant response element; Caln, protein phosphatase 3, catalytic subunit, alpha isoform (Ppp3ca); CaMK-II, calcium/calmodulin-dependent protein kinase II; Cdx1, caudal type homeobox 1; C/EBPβ, CCAAT/enhancer binding protein (C/EBP), beta; CREBBP, CREB-binding protein (CBP); CREB1, cAMP responsive element binding protein 1; Ctnnb1, catenin (cadherin associated protein), beta 1; Ei2, transcription factor E2-alpha; FoxO1, forkhead box O1; GATA4, GATA binding protein 4; GK, glucokinase; GLUT2, glucose transporter type 2; GR, glucocorticoid receptor; GSIS, glucose-stimulated insulin secretion; GSK-3β, glycogen synthase kinase 3 beta; HNF4a, hepatocyte nuclear factor 4, alpha; HPR1, hypoxanthine guanine phosphoribosyl transferase; INS1, preproinsulin 1; NFAT, nuclear factor of activated T-cells; Nfatc4, nuclear factor of activated T cells, cytoplasmic, calcineurin dependent 4; Nkx2.5, NK2 transcription factor related, locus 5; Nrf1, nuclear respiratory factor 1; Nrf2, nuclear factor (erythroid-derived 2)-like 2; Nrf2f1, nuclear receptor subfamily 2, group F, member 1; Nrf2f2, nuclear receptor subfamily 2, group F, member 2; PDX1, pancreatic and duodenal homeobox 1; PGC-1α, peroxisome proliferator-activated receptor gamma coactivator 1 alpha; PPARγ, peroxisome proliferator activated receptor gamma; PXR, pregnane X receptor; RXR, retinoid X receptor; SIRT1, NAD-dependent deacetylase sirtuin-1; SMAD4, SMAD family member 4; Tcf7, transcription factor 7, T cell specific; Tcf7l2, transcription factor 7 like 2, T cell specific, HMG box; UCP2, uncoupling protein 2; Wnt, wingless-type MMTV integration site.
